# Supplementary material for: Advance care planning and a structured palliative plan in primary health care decrease cancer deaths in hospital: A prospective controlled non-randomized intervention trial
Source: Research Square preprint supplement (doi:10.21203/rs.3.rs-3025464/v2), 2023-09-13

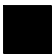

Municipality  
number:

|  |  |
|--|--|
|  |  |
|--|--|

Registration  
number:

|  |  |
|--|--|
|  |  |
|--|--|

12 w

Patient number:

|   |  |  |  |
|---|--|--|--|
| P |  |  |  |
|---|--|--|--|

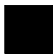

# Cancer care in Romsdal region

## Questionnaire for patients

Completion date:

|  |  |   |  |  |   |   |   |  |  |
|--|--|---|--|--|---|---|---|--|--|
|  |  | . |  |  | . | 2 | 0 |  |  |
|--|--|---|--|--|---|---|---|--|--|

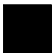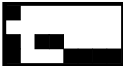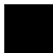

Municipality:

|  |  |
|--|--|
|  |  |
|--|--|

Registration:

|  |  |
|--|--|
|  |  |
|--|--|

Patient:

|  |  |  |
|--|--|--|
|  |  |  |
|--|--|--|

**Living situation**

(Mark with a cross for the option that suits you)

- ☐ Alone
- ☐ Together with spouse/partner
- ☐ Together with spouse/partner and children (also grownup)
- ☐ Together with children (also grownup)
- ☐ Together with other adults (family or others)

**Housing conditions**

(Mark with a cross for the option that suits you)

- ☐ Detached house
- ☐ Terraced house
- ☐ Block/apartment/flat
- ☐ Generational housing
- ☐ Care/Social apartment
- ☐ Retirement home
- ☐ Nursing home
- ☐ Housing with rental

**Professional life**

(several marks possible)

☐ Professionally active

|  |  |  |
|--|--|--|
|  |  |  |
|--|--|--|

% position

☐ Self-employed

☐ Student

☐ Job seeker/unemployed/laid off

☐ Sick leave

|  |  |  |
|--|--|--|
|  |  |  |
|--|--|--|

% sykmeldt

☐ Workclearanceallowance (AAP)

☐ Work disabled

|  |  |  |
|--|--|--|
|  |  |  |
|--|--|--|

% work disable

☐ Retirement pension

|  |  |  |
|--|--|--|
|  |  |  |
|--|--|--|

% pension

**Other benefits / social security schemes**

Did family apply for 60-days care money? ☐ Yes ☐ No

Did family granted 60-days care money? ☐ Ye ☐ No

If yes, which date:

|  |  |   |  |  |   |  |  |  |  |
|--|--|---|--|--|---|--|--|--|--|
|  |  | . |  |  | . |  |  |  |  |
|--|--|---|--|--|---|--|--|--|--|

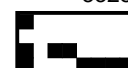

Municipality:

 

Registration:

 

Patient:

  

**Please mark the number that best describes how you feel NOW:**

No Pain

☐ 0 ☐ 1 ☐ 2 ☐ 3 ☐ 4 ☐ 5 ☐ 6 ☐ 7 ☐ 8 ☐ 9 ☐ 10

Worst Possible Pain

No Tiredness  
(Tiredness = lack of energy)

☐ 0 ☐ 1 ☐ 2 ☐ 3 ☐ 4 ☐ 5 ☐ 6 ☐ 7 ☐ 8 ☐ 9 ☐ 10

Worst Possible Tiredness

No Drowsiness  
(Drowsiness = feeling sleepy)

☐ 0 ☐ 1 ☐ 2 ☐ 3 ☐ 4 ☐ 5 ☐ 6 ☐ 7 ☐ 8 ☐ 9 ☐ 10

Worst Possible Drowsiness

No Nausea

☐ 0 ☐ 1 ☐ 2 ☐ 3 ☐ 4 ☐ 5 ☐ 6 ☐ 7 ☐ 8 ☐ 9 ☐ 10

Worst Possible Nausea

No Lack of  
Appetite

☐ 0 ☐ 1 ☐ 2 ☐ 3 ☐ 4 ☐ 5 ☐ 6 ☐ 7 ☐ 8 ☐ 9 ☐ 10

Worst Possible Lack of Appetite

No Shortness of Breath

☐ 0 ☐ 1 ☐ 2 ☐ 3 ☐ 4 ☐ 5 ☐ 6 ☐ 7 ☐ 8 ☐ 9 ☐ 10

Worst Possible Shortness of Breath

No Depression  
(depression = å føle seg nedstemt)

☐ 0 ☐ 1 ☐ 2 ☐ 3 ☐ 4 ☐ 5 ☐ 6 ☐ 7 ☐ 8 ☐ 9 ☐ 10

Worst Possible Depression

No anxiety  
(Anxiety = feeling nervous)

☐ 0 ☐ 1 ☐ 2 ☐ 3 ☐ 4 ☐ 5 ☐ 6 ☐ 7 ☐ 8 ☐ 9 ☐ 10

Worst Possible Anxiety

Best Wellbeing  
(Wellbeing = how you feel overall)

☐ 0 ☐ 1 ☐ 2 ☐ 3 ☐ 4 ☐ 5 ☐ 6 ☐ 7 ☐ 8 ☐ 9 ☐ 10

Worst Possible Wellbeing

Best imaginable  
sleep

☐ 0 ☐ 1 ☐ 2 ☐ 3 ☐ 4 ☐ 5 ☐ 6 ☐ 7 ☐ 8 ☐ 9 ☐ 10

Worst imaginable sleep

No Constipation  
(constipation = obstipation)

☐ 0 ☐ 1 ☐ 2 ☐ 3 ☐ 4 ☐ 5 ☐ 6 ☐ 7 ☐ 8 ☐ 9 ☐ 10

Worst Possible Constipation

No Vomiting

☐ 0 ☐ 1 ☐ 2 ☐ 3 ☐ 4 ☐ 5 ☐ 6 ☐ 7 ☐ 8 ☐ 9 ☐ 10

Worst Possible Vomiting

Municipality:



Registration:



Patient:




Please put a cross under the number that best describes the most severe pain you have had during **the last 24 hours**.

0 1 2 3 4 5 6 7 8 9 10  
☐ ☐ ☐ ☐ ☐ ☐ ☐ ☐ ☐ ☐ ☐

No pain

Worst Possible Pain

Please put a cross under the number that best indicates how severe your pain has been **on average**.

0 1 2 3 4 5 6 7 8 9 10  
☐ ☐ ☐ ☐ ☐ ☐ ☐ ☐ ☐ ☐ ☐

No Pain

Worst Possible Pain

To what extent has treatment or medication relieved your pain in **the past 24 hours**? Please put a cross under the percentage that shows how much pain relief you have had.

0% 10% 20% 30% 40% 50% 60% 70% 80% 90% 100%  
☐ ☐ ☐ ☐ ☐ ☐ ☐ ☐ ☐ ☐ ☐

No Relief

Complete Relief

Breakthrough pain can be defined as a short-term worsening of pain. It may be a worsening of the usual, constant pain you always have (your constant pain) OR it could be a pain that is different from your constant pain.

Have you had breakthrough pain **in the last 24 hours**? ☐ Yes ☐ No

Approximately how many times **in the past 24 hours** have you had this **breakthrough pain**? Please include all episodes, regardless of whether you took medication for them or not.

Number of episodes:



**When this breakthrough pain is at its worst**, how would you describe the pain on a scale of 0-10, where 0 is "no pain" and 10 is "worst possible pain"? Please mark the number that best represents the intensity of your breakthrough pain.

☐ 0 ☐ 1 ☐ 2 ☐ 3 ☐ 4 ☐ 5 ☐ 6 ☐ 7 ☐ 8 ☐ 9 ☐ 10

No Pain

Worst Possible Pain

Municipality:

|  |  |
|--|--|
|  |  |
|--|--|

Registration:

|  |  |
|--|--|
|  |  |
|--|--|

Patient:

|  |  |  |
|--|--|--|
|  |  |  |
|--|--|--|

During the **last 2 weeks**, how often have you been bothered by one or more of the following problems?

|                                                                                                                                                   | Not at all               | Some days                | More than 7 days         | Nearly every day         |
|---------------------------------------------------------------------------------------------------------------------------------------------------|--------------------------|--------------------------|--------------------------|--------------------------|
| Little interest or joy in doing things                                                                                                            | <input type="checkbox"/> | <input type="checkbox"/> | <input type="checkbox"/> | <input type="checkbox"/> |
| Feeling down, depressed or filled with hopelessness                                                                                               | <input type="checkbox"/> | <input type="checkbox"/> | <input type="checkbox"/> | <input type="checkbox"/> |
| Difficulty falling asleep or sleeping through the night without waking - or sleeping too much                                                     | <input type="checkbox"/> | <input type="checkbox"/> | <input type="checkbox"/> | <input type="checkbox"/> |
| Feeling tired or lethargic                                                                                                                        | <input type="checkbox"/> | <input type="checkbox"/> | <input type="checkbox"/> | <input type="checkbox"/> |
| Poor appetite or eating too much                                                                                                                  | <input type="checkbox"/> | <input type="checkbox"/> | <input type="checkbox"/> | <input type="checkbox"/> |
| Been unhappy with yourself or felt like a failure - or felt like you've let yourself or your family down                                          | <input type="checkbox"/> | <input type="checkbox"/> | <input type="checkbox"/> | <input type="checkbox"/> |
| Difficulty concentrating on things, such as reading the newspaper or watching TV                                                                  | <input type="checkbox"/> | <input type="checkbox"/> | <input type="checkbox"/> | <input type="checkbox"/> |
| Did you move or speak so slowly that others might have noticed? Or the opposite - felt so restless that you have been moving much more than usual | <input type="checkbox"/> | <input type="checkbox"/> | <input type="checkbox"/> | <input type="checkbox"/> |
| Thoughts that you might as well be dead or would otherwise harm yourself                                                                          | <input type="checkbox"/> | <input type="checkbox"/> | <input type="checkbox"/> | <input type="checkbox"/> |

If you have experienced one or more of the problems mentioned, to what extent have the problems made it difficult for you to carry out your work, arrange things at home or get along with others?

- ☐ Not difficult at all
- ☐ A little bit difficult
- ☐ Very difficult
- ☐ Extremely difficult

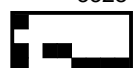

Municipality:

|  |  |
|--|--|
|  |  |
|--|--|

Registration:

|  |  |
|--|--|
|  |  |
|--|--|

Patient:

|  |  |  |
|--|--|--|
|  |  |  |
|--|--|--|

## Weight

I weigh  
approx

|  |  |  |   |  |
|--|--|--|---|--|
|  |  |  | . |  |
|--|--|--|---|--|

 kg

For the past two weeks, my weight has: (choose one)

☐ Decreased

☐ Been unchanged

☐ Increased

## Food intake

Compared to my normal, my food intake has  
**over the last 4 weeks** been: (choose one)

☐ Unchanged

☐ More than usual

☐ Less than usual

I eat and drink now: (only answered if you eat less than usual) (choose one answer option)

☐ Usual food, but less than usual

☐ Only liquid

☐ Only nutritional drinks

☐ Very little of everything

☐ Tube feeding or intravenous feeding only

Municipality:



Registration:



Patient:




|                                                                    | Not at all               | Little                   | Some                     | Very much                |
|--------------------------------------------------------------------|--------------------------|--------------------------|--------------------------|--------------------------|
| Do you have difficulties going for a short walk outdoors?          | <input type="checkbox"/> | <input type="checkbox"/> | <input type="checkbox"/> | <input type="checkbox"/> |
| Do you have to lie in bed or sit in a chair during the day?        | <input type="checkbox"/> | <input type="checkbox"/> | <input type="checkbox"/> | <input type="checkbox"/> |
| Do you need help eating, dressing, washing or going to the toilet? | <input type="checkbox"/> | <input type="checkbox"/> | <input type="checkbox"/> | <input type="checkbox"/> |

**During the last week:**

|                                          |                          |                          |                          |                          |
|------------------------------------------|--------------------------|--------------------------|--------------------------|--------------------------|
| Have you been short of breath?           | <input type="checkbox"/> | <input type="checkbox"/> | <input type="checkbox"/> | <input type="checkbox"/> |
| Have you had pain?                       | <input type="checkbox"/> | <input type="checkbox"/> | <input type="checkbox"/> | <input type="checkbox"/> |
| Have you had sleep problems?             | <input type="checkbox"/> | <input type="checkbox"/> | <input type="checkbox"/> | <input type="checkbox"/> |
| Have you felt lethargic?                 | <input type="checkbox"/> | <input type="checkbox"/> | <input type="checkbox"/> | <input type="checkbox"/> |
| Have you had a bad appetite?             | <input type="checkbox"/> | <input type="checkbox"/> | <input type="checkbox"/> | <input type="checkbox"/> |
| Have you been nauseous?                  | <input type="checkbox"/> | <input type="checkbox"/> | <input type="checkbox"/> | <input type="checkbox"/> |
| Have you had constipation?               | <input type="checkbox"/> | <input type="checkbox"/> | <input type="checkbox"/> | <input type="checkbox"/> |
| Have you felt tired?                     | <input type="checkbox"/> | <input type="checkbox"/> | <input type="checkbox"/> | <input type="checkbox"/> |
| Has pain affected your daily activities? | <input type="checkbox"/> | <input type="checkbox"/> | <input type="checkbox"/> | <input type="checkbox"/> |
| Have you been feeling tense?             | <input type="checkbox"/> | <input type="checkbox"/> | <input type="checkbox"/> | <input type="checkbox"/> |
| Have you felt depressed?                 | <input type="checkbox"/> | <input type="checkbox"/> | <input type="checkbox"/> | <input type="checkbox"/> |

**In response to the following questions, put a cross next to the number from 1 to 7 that best describes your condition**

How has your quality of life been during **the past week?**

|                          |                          |                          |                          |                          |                          |                          |
|--------------------------|--------------------------|--------------------------|--------------------------|--------------------------|--------------------------|--------------------------|
| <input type="checkbox"/> |
| 1                        | 2                        | 3                        | 4                        | 5                        | 6                        | 7                        |
| Very poor                |                          |                          |                          |                          |                          | Excellent                |

Municipality:



Registration:



Patient:



**During the last week:**

|                                                                                                 | Not at<br>all            | Littl                    | Some                     | Very<br>much             |
|-------------------------------------------------------------------------------------------------|--------------------------|--------------------------|--------------------------|--------------------------|
| Have you been worried about how your spouse and family will cope in the future?                 | <input type="checkbox"/> | <input type="checkbox"/> | <input type="checkbox"/> | <input type="checkbox"/> |
| Have you had support from family and friends?                                                   | <input type="checkbox"/> | <input type="checkbox"/> | <input type="checkbox"/> | <input type="checkbox"/> |
| Have your family / friends been of use to you?                                                  | <input type="checkbox"/> | <input type="checkbox"/> | <input type="checkbox"/> | <input type="checkbox"/> |
| Have you been able to share your feelings with others?                                          | <input type="checkbox"/> | <input type="checkbox"/> | <input type="checkbox"/> | <input type="checkbox"/> |
| Have you had good contact with others outside the family, such as friends, workmates or others? | <input type="checkbox"/> | <input type="checkbox"/> | <input type="checkbox"/> | <input type="checkbox"/> |

We know from experience that you might change your mind over time. We would like to get your opinion about the next questions again, independently of what you have answered earlier.

**Many people, both healthy and ill, think about where they in time would like to die. When that time comes, and you yourself could choose, where would you prefer to die?**

☐ Home☐ Hospital☐ Nursing home☐ Other, specify: \_\_\_\_\_

**If you could choose where you would spend the last part of your life, where would you most like to receive treatment, care and attention?**

☐ Home☐ Home☐ Nursing  
home☐ Other, specify: \_\_\_\_\_

**Think three months into the future. How important is it to you, in the next three months, that you receive treatment and care in your home without admission to hospital or a nursing home?**

☐ Not important at all☐ Little  
important☐ Quite  
important☐ Very important

**We are interested in the information you have received about your illness and how it is treated.**

|                                                         | Not at<br>all            | Littl                    | Some                     | Very<br>much             |
|---------------------------------------------------------|--------------------------|--------------------------|--------------------------|--------------------------|
| Are you satisfied with information you have received?   | <input type="checkbox"/> | <input type="checkbox"/> | <input type="checkbox"/> | <input type="checkbox"/> |
| By and large, the information you got has been helpful? | <input type="checkbox"/> | <input type="checkbox"/> | <input type="checkbox"/> | <input type="checkbox"/> |



Municipality:

|  |  |
|--|--|
|  |  |
|--|--|

Registration:

|  |  |
|--|--|
|  |  |
|--|--|

Patient:

|  |  |  |
|--|--|--|
|  |  |  |
|--|--|--|

Show which statements best fit your state of health **today** by putting a cross in one of the boxes outside each of the groups below.

### Walking

- ☐ I have no problems walking around
- ☐ I have little problems walking around
- ☐ I am bedridden

### Personal care

- ☐ I have no problems with personal care
- ☐ I have some trouble washing or dressing myself
- ☐ I am unable to wash or dress myself

**Common tasks** (e.g. work, studies, housework, family or leisure activities)

- ☐ I have no problems carrying out my usual tasks
- ☐ I'm having some trouble doing my usual tasks
- ☐ I am unable to carry out my usual tasks

### Pain/discomfort

- ☐ I have neither pain nor discomfort
- ☐ I have moderate pain or discomfort
- ☐ I have severe pain or discomfort

### Anxiety/depression

- ☐ I am neither anxious nor depressed
- ☐ I am somewhat anxious or depressed
- ☐ I am very anxious or depressed



Municipality:

|  |  |
|--|--|
|  |  |
|--|--|

Registration:

|  |  |
|--|--|
|  |  |
|--|--|

Patient:

|  |  |  |
|--|--|--|
|  |  |  |
|--|--|--|



To help people say how good or bad a state of health is, we have created a scale (much like a thermometer) where the best state you can imagine is marked 100 and the worst state you can imagine is marked 0.

We would like you to indicate on this scale how good or bad your state of health is today, in your opinion. Please do this by drawing a line from the box below to the point on the scale that shows how good or bad your health is **today**

Din egen  
helsetilstand  
i dag

Best imaginable  
state of health

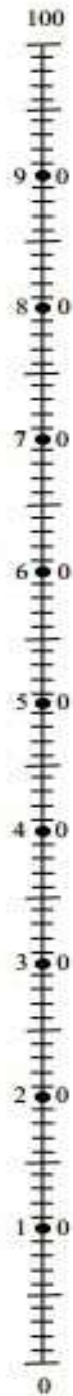

Worst imaginable state of  
health

Do not write here

|  |  |  |
|--|--|--|
|  |  |  |
|--|--|--|

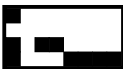

Municipality:



Registration:



Patient:



Mark each line to indicate your answer as it applies to **the last week**

|                                               | Not at<br>all            | Litl                     | Certain<br>extend        | Much                     | Very<br>much             |
|-----------------------------------------------|--------------------------|--------------------------|--------------------------|--------------------------|--------------------------|
| I feel an inner peace                         | <input type="checkbox"/> |
| I have reason to live                         | <input type="checkbox"/> |
| I've had a lot done in my life                | <input type="checkbox"/> |
| Hard time to find peace of mind               | <input type="checkbox"/> |
| I feel that my life has a purpose             | <input type="checkbox"/> |
| I am able to go inside myself to find comfort | <input type="checkbox"/> |
| I feel a kind of harmony inside me            | <input type="checkbox"/> |
| My life lacks meaning and purpose             | <input type="checkbox"/> |

|                                       | Doesn't<br>match at<br>all |                          |                          |                          |                          | Totally<br>agree         |
|---------------------------------------|----------------------------|--------------------------|--------------------------|--------------------------|--------------------------|--------------------------|
|                                       | 0                          | 1                        | 2                        | 3                        | 4                        | 5                        |
| Religion is important part of my life | <input type="checkbox"/>   | <input type="checkbox"/> | <input type="checkbox"/> | <input type="checkbox"/> | <input type="checkbox"/> | <input type="checkbox"/> |
| It is important for me to pray        | <input type="checkbox"/>   | <input type="checkbox"/> | <input type="checkbox"/> | <input type="checkbox"/> | <input type="checkbox"/> | <input type="checkbox"/> |
| I draw strength from my faith         | <input type="checkbox"/>   | <input type="checkbox"/> | <input type="checkbox"/> | <input type="checkbox"/> | <input type="checkbox"/> | <input type="checkbox"/> |

Have all questions been answered?

☐ Yes
 ☐ No

Filled out: (Putt one mark)

- ☐ Patient  
☐ Patient with some help from relatives and/or health care personnel  
☐ Relatives interviewed the patient and filled in the form  
☐ Healthcare personnel interviewed the patient and filled in the form

Thank you for taking you time to answer the questions

3328

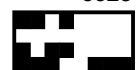

Supplement: Supplementary file 2 [file 9771a7e35e2a769bb5f010dd.pdf]
